# Supplementary material for: Selective detection of inorganic phosphates in live cells based on a responsive fluorescence probe
Source: Royal Society of Chemistry journal article supplement (doi:10.1039/c7nj01983a), 2017-01-01
Supplement: c7nj01983a1.pdf [file c7nj01983a1.pdf]

## Supplementary Information for:

### Selective Detection of Inorganic Phosphates in Live Cells Based on a Responsive Fluorescence Probe

Huan Feng,<sup>a</sup> Yue Wang,<sup>a</sup> Hongmin Jia,<sup>a</sup> Run Zhang,<sup>a,b,\*</sup> Qian Han,<sup>a</sup> Qingtao Meng,<sup>a,\*</sup> Zhiqiang Zhang<sup>a</sup>

<sup>a</sup> School of Chemical Engineering, University of Science and Technology Liaoning, Anshan, 114044, China

E-mail: Qingtao Meng, qtmeng@ustl.edu.cn. Tel: +86-412-5929627

<sup>b</sup> Australian Institute for Bioengineering and Nanotechnology, The University of Queensland, Brisbane, 4072, Australia

E-mail: Run Zhang, r.zhang@uq.edu.au, Tel: +61-7-33463806

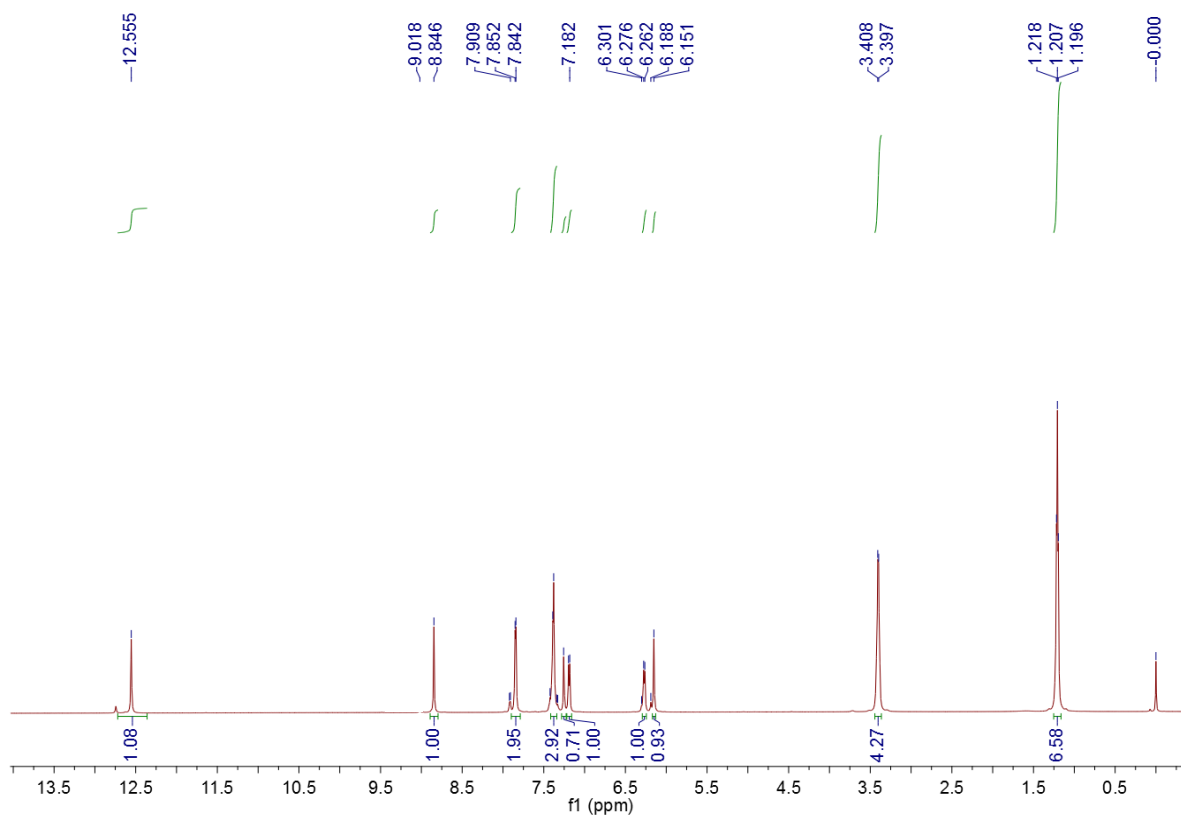

**Fig. S1**  $^1\text{H}$  NMR of **L** ( $\text{CDCl}_3$ )

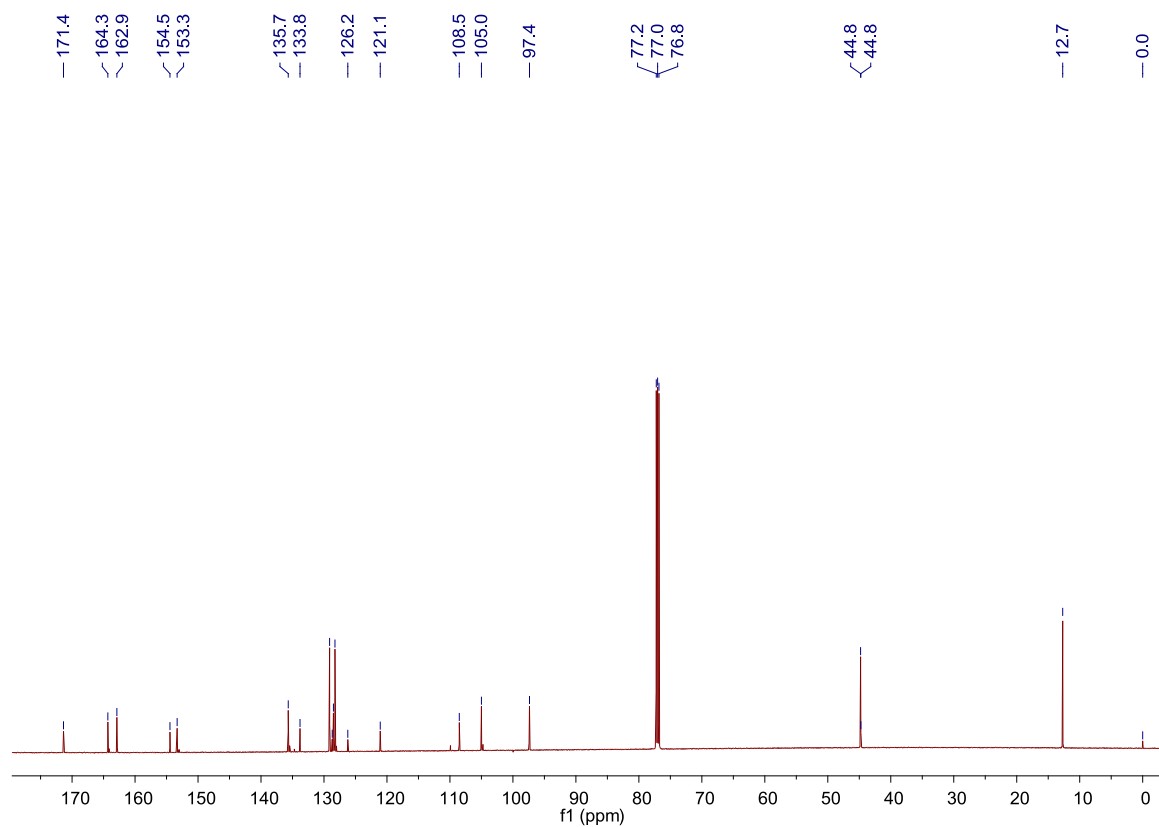

**Fig. S2**  $^{13}\text{C}$  NMR of **L** ( $\text{CDCl}_3$ )

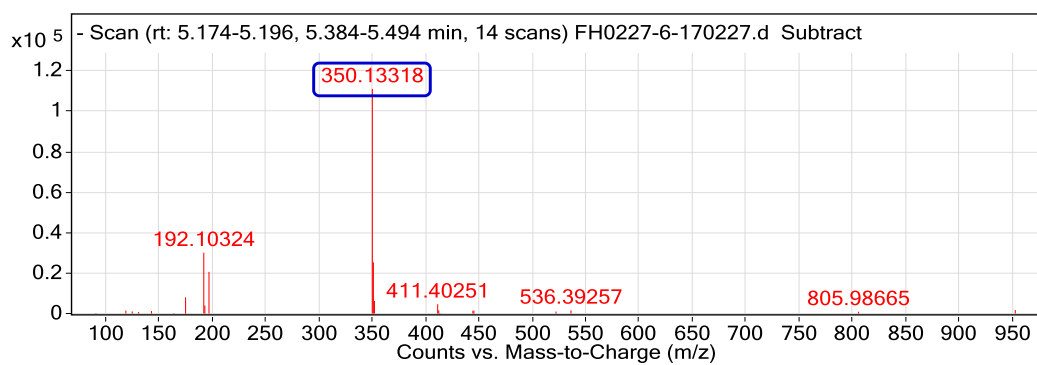

**Fig. S3** HR MS of **L**

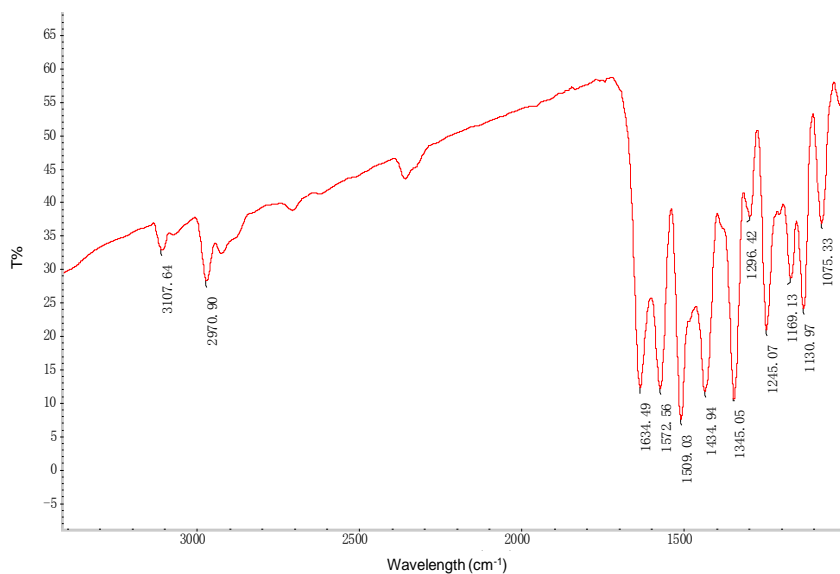

**Fig. S4** IR spectra of **L**

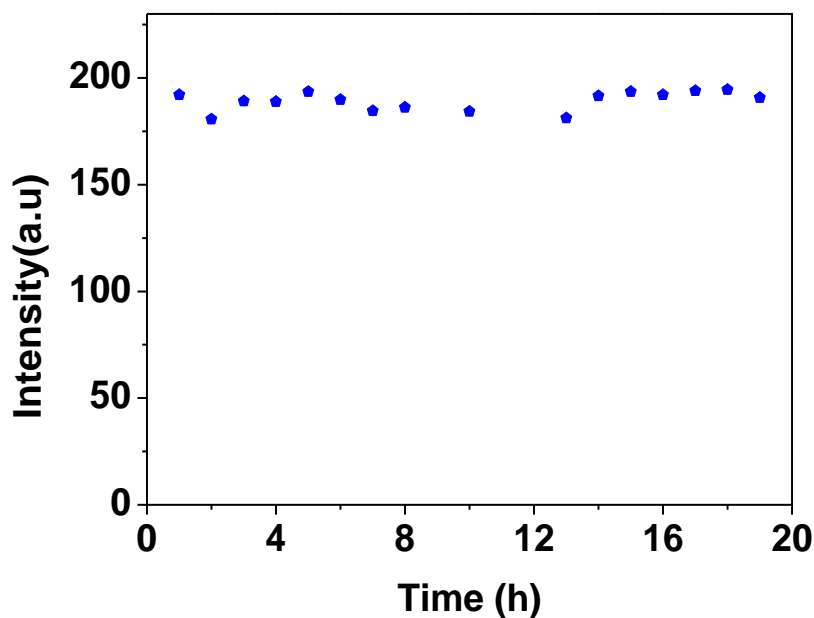

**Fig. S5** Fluorescence spectra of **L** (10  $\mu$ M) at different times in HEPES aqueous buffer (DMSO: HEPES = 3:7, 20 mM, pH = 7.4). The intensities were recorded at 490 nm, excitation at 430 nm.

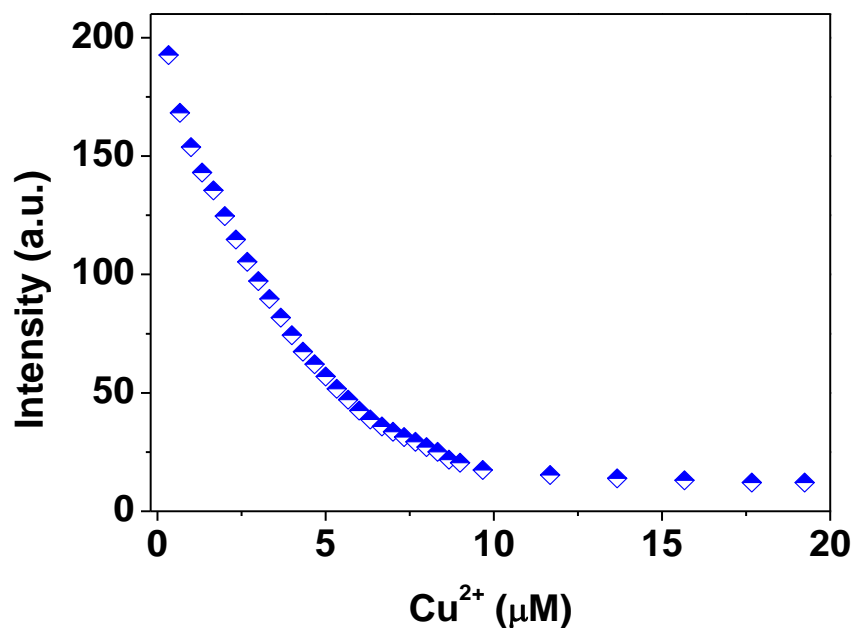

**Fig. S6** Fluorescence intensities of **L** (10  $\mu\text{M}$ ) at 490 nm as a function of  $\text{Cu}^{2+}$  concentration (0–20  $\mu\text{M}$ ) in HEPES aqueous buffer (DMSO: HEPES = 3:7, 20 mM, pH = 7.4). Excitation was performed at 430 nm.

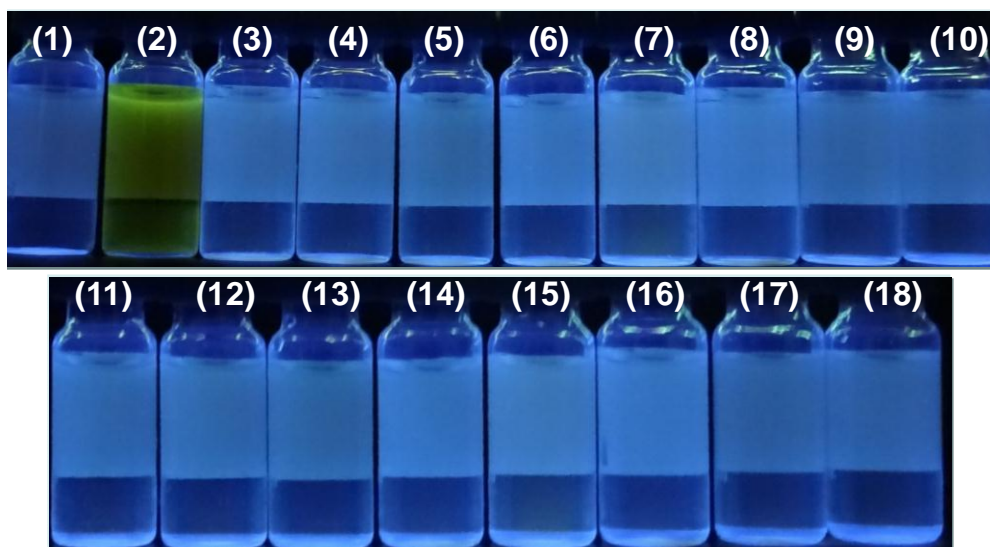

**Fig. S7** Fluorescence color images of **L-Cu<sup>2+</sup>** (10  $\mu\text{M}$ ) in HEPES aqueous buffer (DMSO: HEPES = 3:7, 20 mM, pH = 7.4) in the presence of various anionic analytes (40  $\mu\text{M}$ ) under UV light: (1) Blank, (2) Pi, (3)  $\text{Br}^-$ , (4)  $\text{Cl}^-$ , (5)  $\text{F}^-$ , (6)  $\text{HCO}_3^-$ , (7)  $\text{AcO}^-$ , (8)  $\text{S}^{2-}$ , (9)  $\text{SCN}^-$ , (10)  $\text{OH}^-$ , (11)  $\text{NO}_2^-$ , (12)  $\text{HSO}_4^-$ , (13)  $\text{CO}_3^{2-}$ , (14)  $\text{SO}_4^{2-}$ , (15) AMP, (16) ADP, (17) ATP, (18) PPI.

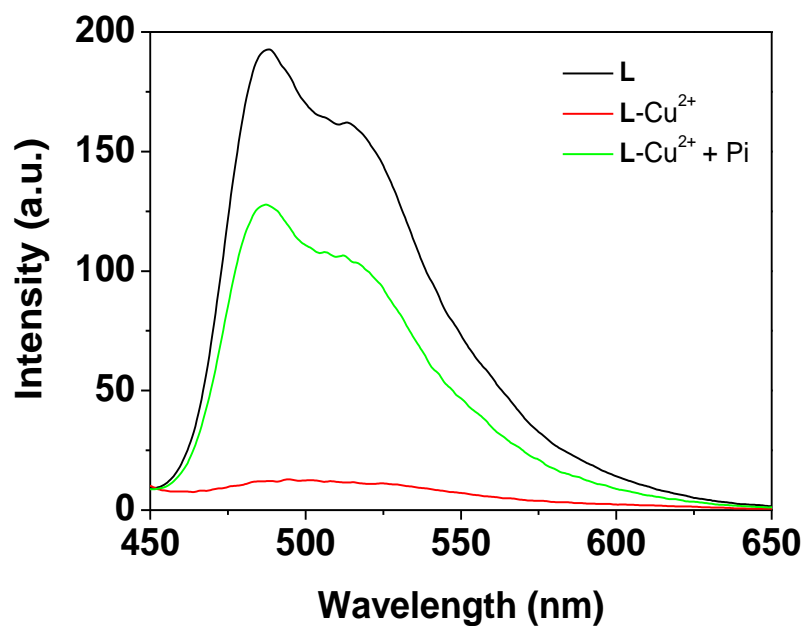

**Fig. S8** Fluorescence spectra of (a) L (10 μM), sequential upon addition of (b) Cu<sup>2+</sup> (20 μM) and (c) Pi (40 μM) in HEPES aqueous buffer (DMSO: HEPES = 3:7, 20 mM, pH = 7.4). Excitation was performed at 430 nm.

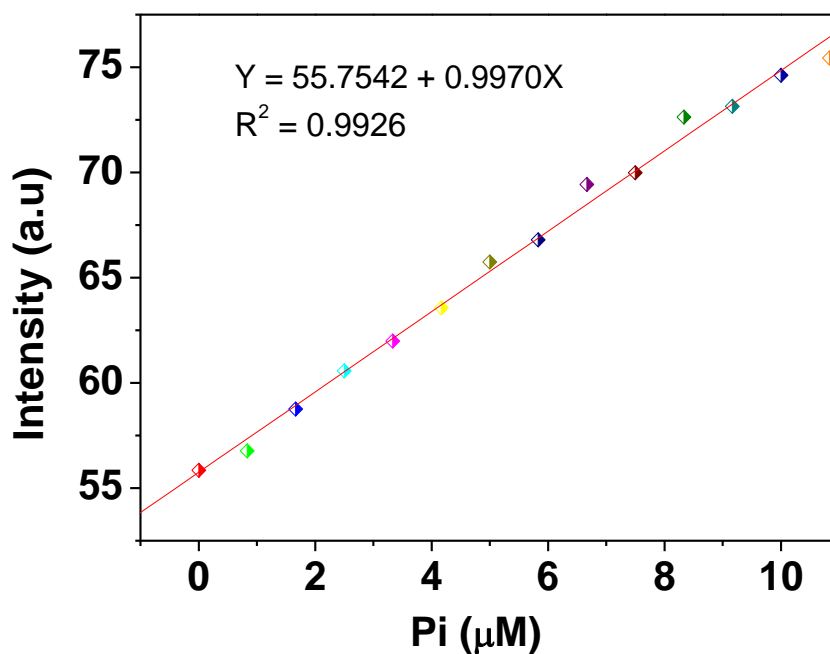

**Fig. S9** Linear relationship between fluorescence intensity of L-Cu<sup>2+</sup> (3 μM) at 490 nm versus the concentration of Pi (0–11 μM) in HEPES aqueous buffer (DMSO: HEPES = 3:7, 20 mM, pH = 7.4). Excitation was performed at 430 nm.

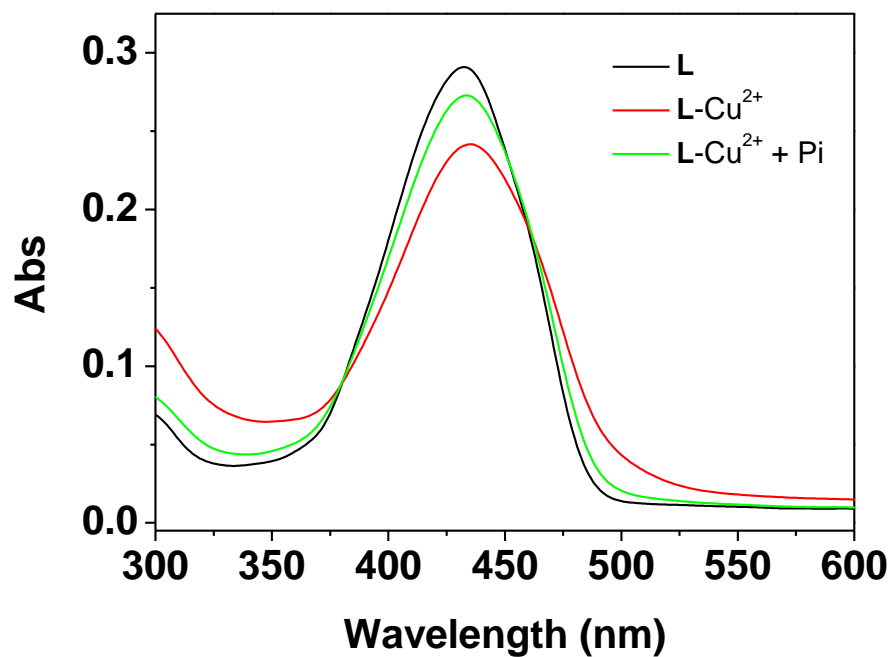

**Fig. S10** UV-vis absorption spectra of (a) **L** (10  $\mu\text{M}$ ), sequential upon addition of (b)  $\text{Cu}^{2+}$  (20  $\mu\text{M}$ ) and (c) **Pi** (40  $\mu\text{M}$ ) in HEPES aqueous buffer (DMSO: HEPES = 3:7, 20 mM, pH = 7.4).

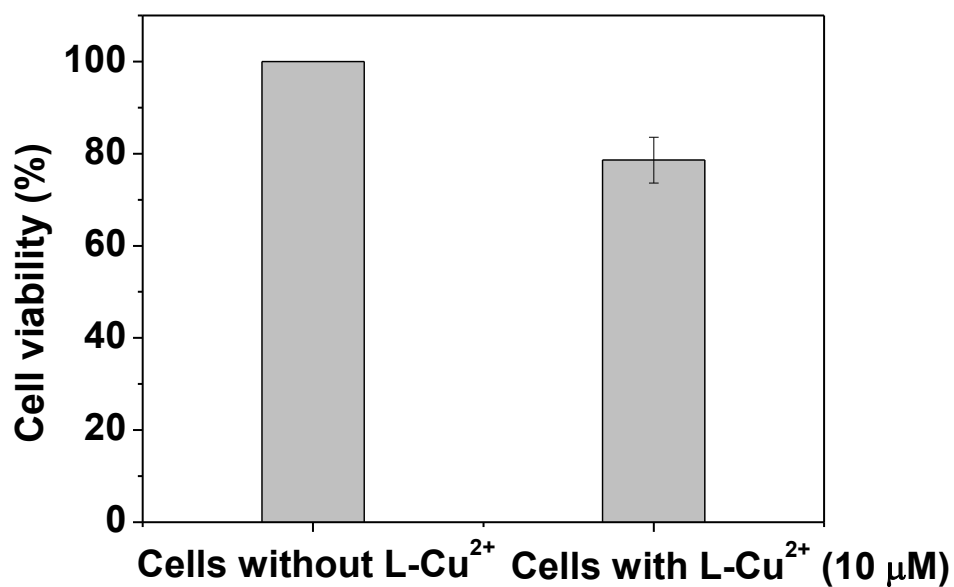

**Fig. S 11** MTT assay of MDA-MB-231 cells treated with  $\text{L-Cu}^{2+}$ .
